# Supplementary material for: Human Endogenous Retrovirus W Activity in Cartilage of Osteoarthritis Patients
Source: Hindawi journal article supplement (doi:10.1155/2014/698609), 2014-01-01
Supplement: f1 [file 698609.f1.pdf]

**Supplementary Table.**

| <u>Patient</u> | <u>year of birth</u> | <u>Age at sampling</u> | <u>KL grade</u> |
|----------------|----------------------|------------------------|-----------------|
| OA1            | missing              |                        |                 |
| OA2            | 1947                 | 59                     | 2               |
| OA3            | 1960                 | 46                     | 2               |
| OA04           | 1932                 | 74                     | 1               |
| OA5            | 1965                 | 41                     | 3               |
| OA7            | 1929                 | 77                     | 1               |
| OA8            | 1937                 | 69                     | 1               |
| OA9            | NA                   |                        |                 |
| OA10           | 1945                 | 61                     | 2               |
| OA11           | 1970                 | 36                     | 3               |
| OA13           | 1938                 | 68                     | 1               |
| OA14           | 1940                 | 66                     | 1               |
| OA15           | 1939                 | 67                     | 1               |
| OA16           | 1950                 | 56                     | 2               |
| OA17           | 1944                 | 62                     | 2               |
| OA18           | 1959                 | 47                     | 2               |
| OA12           | 1970                 | 36                     | 3               |
| OA20           | NA                   |                        |                 |
| OA21           | 1971                 | 35                     | 3               |
| OA22           | 1929                 | 77                     | 1               |
| OA23           | 1929                 | 78                     | 1               |
| OA24           | 1944                 | 63                     | 2               |
| OA25           | 1940                 | 67                     | 1               |
| OA26           | 1951                 | 56                     | 2               |
| OA27           | 1939                 | 68                     | 1               |
| OA28           | 1925                 | 82                     | 1               |
| OA29           | 1934                 | 73                     | 1               |
| OA30           | 1930                 | 77                     | 1               |
| OA32           | 1982                 | 25                     | 3               |
| OA40           | 1970                 | 37                     | 3               |
| OA44           | 1944                 | 63                     | 2               |
| OA48           | 1927                 | 80                     | 1               |
| OA50           | 1952                 | 56                     | 2               |
| OA51           | 1950                 | 58                     | 2               |
| OA58           | 1929                 | 79                     | 1               |

NA: not available.
